# Supplementary material
Source: PubMed Central journal article supplement (PMC5538786)
Supplement: NIHMS885921-supplement-supplemental_figures.pdf [file NIHMS885921-supplement-supplemental_figures.pdf]

## Supplementary Materials.

### Supplementary figure

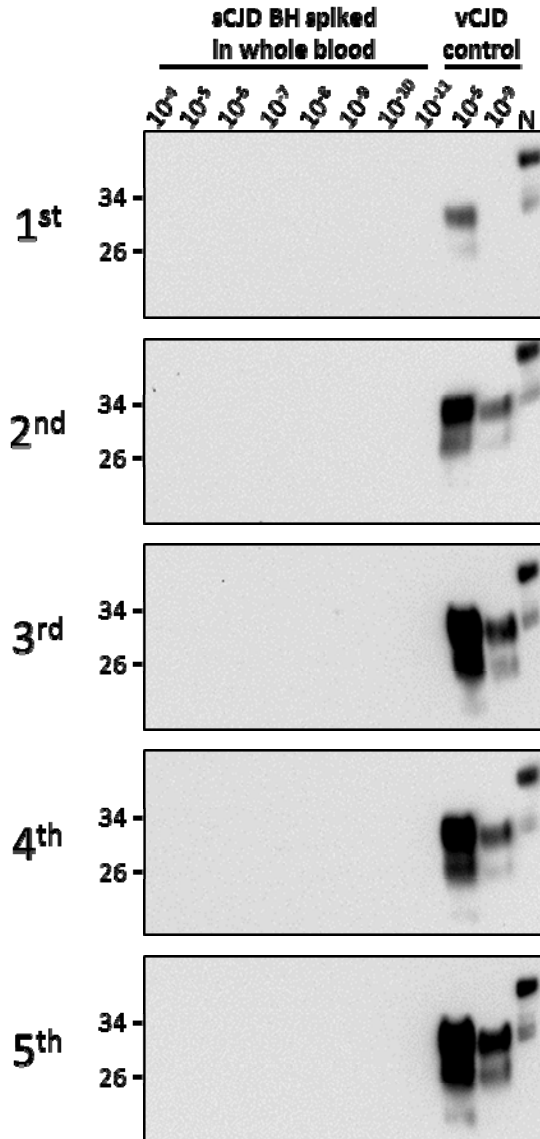

**Supplementary figure 1. Spiking of sCJD brain homogenate in blood.** To determine if our PMCA optimized for the specific detection of vCJD amplifies sCJD prions, we spiked dilutions of sCJD brain homogenate (ranging  $10^{-4}$  to  $10^{-11}$ ) into whole blood and analyzed them by PMCA using the same protocol used for vCJD. Side by side, we analyzed 2 dilutions of vCJD ( $10^{-5}$  and  $10^{-9}$ ) as positive controls of PMCA.

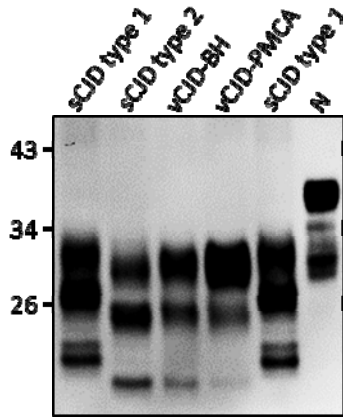

**Supplementary figure 2. Molecular typing of vCJD prions amplified by PMCA from blood.** Brain homogenate from vCJD and vCJD amplified material were treated with 50  $\mu\text{g/ml}$  PK for 1 hr at 37 °C and 600 rpm agitation. Brain homogenate from sCJD (type 1 and 2) were treated with 25  $\mu\text{g/ml}$  PK, under the same conditions described for vCJD.
